# Supplementary material for: Tratamiento estadístico de las series cronológicas en el Antiguo Régimen
Source: MDPI journal article supplement (doi:10.3390/biom13020338), 1989-01-01
Supplement: s1 [file s1]

**Table S1.** Stratified analyses for the association between plasma NGAL concentrations and the risk of incident CKD across various subgroups.

| Variable               | Total (n) | New-onset CKD (n) | HR (95% CI)      | P-value for interaction |
|------------------------|-----------|-------------------|------------------|-------------------------|
| <b>Overall</b>         | 4,660     | 467               | 1.37 [1.09-1.73] |                         |
| <b>Gender</b>          |           |                   |                  |                         |
| Male                   | 2,147     | 266               | 1.36 [0.98-1.88] | 0.919                   |
| Female                 | 2,513     | 201               | 1.31 [0.95-1.81] |                         |
| <b>BMI</b>             |           |                   |                  |                         |
| < 25 kg/m <sup>2</sup> | 1,976     | 163               | 1.57 [1.06-2.34] | 0.671                   |
| ≥ 25 kg/m <sup>2</sup> | 2,684     | 304               | 1.29 [0.97-1.72] |                         |
| <b>Hypertension</b>    |           |                   |                  |                         |
| No                     | 3,492     | 263               | 1.20 [0.89-1.62] | 0.113                   |
| Yes                    | 1,166     | 203               | 1.68 [1.19-2.36] |                         |
| <b>History of CVD</b>  |           |                   |                  |                         |
| No                     | 4,537     | 445               | 1.37 [1.09-1.73] | 0.805                   |

|                                    |       |     |                  |                  |
|------------------------------------|-------|-----|------------------|------------------|
| Yes                                | 123   | 22  | 1.12 [0.34-3.66] |                  |
| <b>UAE</b>                         |       |     |                  |                  |
| < 7.7 mg/24-h                      | 2,330 | 96  | 1.69 [1.04-2.73] | <b>&lt;0.001</b> |
| > 7.7 mg/24-h                      | 2,330 | 371 | 1.36 [1.04-1.77] |                  |
| <b>eGFR</b>                        |       |     |                  |                  |
| 60-89<br>mL/min/1.73m <sup>2</sup> | 1,614 | 264 | 1.38 [1.01-1.89] | <b>&lt;0.001</b> |
| ≥ 90 mL/min/1.73m <sup>2</sup>     | 2,998 | 203 | 1.09 [0.78-1.52] |                  |
| <b>Current smoking</b>             |       |     |                  |                  |
| No                                 | 3,319 | 329 | 1.67 [1.25-2.22] | <b>0.034</b>     |
| Yes                                | 1,283 | 130 | 0.78 [0.52-1.17] |                  |
| <b>Total cholesterol</b>           |       |     |                  |                  |
| < 5.36 mmol/L                      | 2,330 | 210 | 1.52 [1.07-2.15] | 0.878            |
| > 5.36 mmol/L                      | 2,330 | 256 | 1.22 [0.90-1.66] |                  |

Abbreviations: CKD, chronic kidney disease; CI, confidence interval; HR, hazard ratio; eGFR, estimated glomerular filtration rate; UAE, urinary albumin excretion; BMI, body-mass index; CHF, chronic heart failure.
